# Supplementary material for: The Zishen Yutai pill shows no reproductive toxicity on embryo-fetal development in rats and rabbits
Source: Royal Society of Chemistry journal article supplement (doi:10.1039/c4tx00145a), 2015-01-01
Supplement: c4tx00145a1.pdf [file c4tx00145a1.pdf]

ESI Table 1: Doses of ZYP and its controls used in this study.

| Groups                      | n  | Dose (g/kg/d) | Time of equivalent dose | Time of clinical dose |
|-----------------------------|----|---------------|-------------------------|-----------------------|
| Rats                        |    |               |                         |                       |
| Negative control group      | 21 | -             | -                       | -                     |
| Positive control group      | 21 | 0.015         | -                       | -                     |
| Low dose-treated group      | 20 | 6             | 4                       | 24                    |
| Moderate dose-treated group | 21 | 12            | 8                       | 48                    |
| High dose-treated group     | 22 | 24            | 16                      | 96                    |
| Rabbits                     |    |               |                         |                       |
| Negative control group      | 12 | -             | -                       | -                     |
| Positive control group      | 13 | 0.018         | -                       | -                     |
| Low dose-treated group      | 12 | 1.5           | 2                       | 6                     |
| Moderate dose-treated group | 12 | 3.0           | 4                       | 12                    |
| High dose-treated group     | 14 | 6.0           | 8                       | 24                    |

ZYP, Zishen Yutai pill.

Various doses of ZYP were administrated in the treated groups; physiological saline was used in the negative control group; cyclophosphomide was used in the positive control group. The equivalent doses of ZYP for rats and rabbits were 1.5 g/kg and 0.75g/kg, respectively.
